# Supplementary material for: Mitochondrial and Wolbachia phylogenetics of the introduced Jorō spider, Trichonephila clavata (Araneae: Araneidae) in North America
Source: PeerJ journal article supplement (doi:10.7717/peerj.19952), 2025-09-15
Supplement: Supp_Mat.1.pdf [file Supp_Mat.1.pdf]

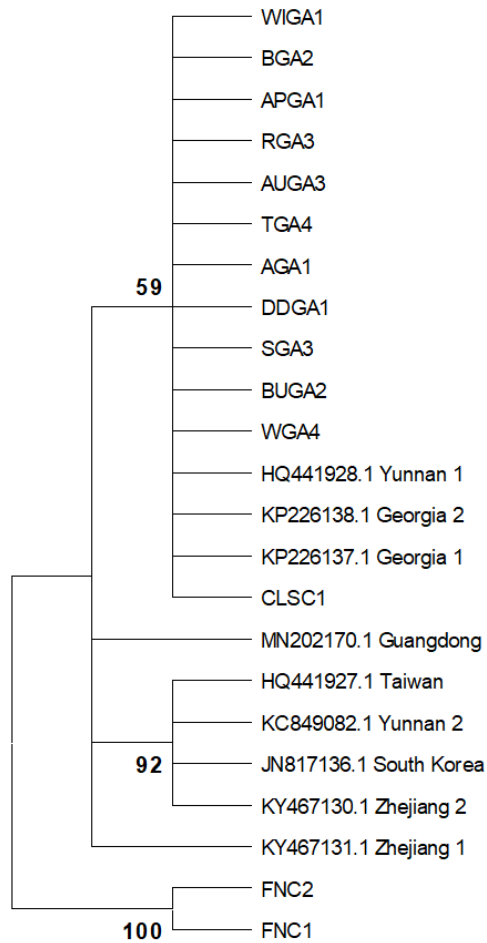

**Supp Mat. 1.** The evolutionary history of the COI gene region for *T.clavata* was inferred by using the Maximum Likelihood method and Tamura-Nei model [1]. The tree with the highest log likelihood (-1142.46) is shown. The percentage of trees in which the associated taxa clustered together is shown next to the branches. Initial tree(s) for the heuristic search were obtained automatically by applying Neighbor-Join and BioNJ algorithms to a matrix of pairwise distances estimated using the Tamura-Nei model, and then selecting the topology with superior log likelihood value. A discrete Gamma distribution was used to model evolutionary rate differences among sites (5 categories (+G, parameter = 0.1500)). This analysis involved 23 nucleotide sequences. Codon positions included were 1st+2nd+3rd+Noncoding. There were a total of 620 positions in the final dataset.
