# Supplementary material for: Mitochondrial and Wolbachia phylogenetics of the introduced Jorō spider, Trichonephila clavata (Araneae: Araneidae) in North America
Source: PeerJ journal article supplement (doi:10.7717/peerj.19952), 2025-09-15
Supplement: Wolbachia_MLST_accessions.docx [file Wolbachia_MLST_accessions.docx]

| **Wolbachia MLST locus** | **GenBank accession numbers** |
| --- | --- |
| *fbpA* | PV236029 - PV236040 |
| *hcpA* | PV236041 - PV236052 |
| *coxA* | PV236053 - PV236064 |
| *gatB* | PV236065 - PV236077 |

**Supp. Table 1.** Wolbachia multi-locus sequence typing (MLST) loci and the associated accession numbers are shown below.
